# Supplementary material
Source: publisher figshare collection journal article supplement (https://karger.figshare.com/ndownloader/files/16862966)
Supplement: Supplementary file 1 [file 16862966]

**Supplementary Table S1.** Key inclusion and exclusion criteria for DIALOGUES 1, 2, and 4

| DIALOGUE 1                                                                                                                                                                                                                                                                                                                                                                                                                                                                                                                                                                                                                                                                                                                                                                                                                                                   | DIALOGUE 2                                                                                                                            | DIALOGUE 4                                                                                                                                                                                                   |
|--------------------------------------------------------------------------------------------------------------------------------------------------------------------------------------------------------------------------------------------------------------------------------------------------------------------------------------------------------------------------------------------------------------------------------------------------------------------------------------------------------------------------------------------------------------------------------------------------------------------------------------------------------------------------------------------------------------------------------------------------------------------------------------------------------------------------------------------------------------|---------------------------------------------------------------------------------------------------------------------------------------|--------------------------------------------------------------------------------------------------------------------------------------------------------------------------------------------------------------|
| <b>Inclusion criteria</b>                                                                                                                                                                                                                                                                                                                                                                                                                                                                                                                                                                                                                                                                                                                                                                                                                                    |                                                                                                                                       |                                                                                                                                                                                                              |
| <ul style="list-style-type: none"> <li>• Diagnosis of anemia associated with CKD</li> <li>• Men and women <math>\geq 18</math> years of age</li> <li>• Serum ferritin levels <math>\geq 100</math> <math>\mu\text{g/L}</math> and <math>&lt; 1,000</math> <math>\mu\text{g/L}</math> or TSAT <math>\geq 20\%</math></li> <li>• Folate and vitamin B<sub>12</sub> values above the lower limit of normal</li> </ul>                                                                                                                                                                                                                                                                                                                                                                                                                                           |                                                                                                                                       |                                                                                                                                                                                                              |
| <ul style="list-style-type: none"> <li>• eGFR <math>&lt; 60</math> mL/min/1.73 m<sup>2</sup></li> <li>• Not undergoing dialysis or expected to begin dialysis during the study (<math>\geq 16</math> weeks after randomization)</li> </ul>                                                                                                                                                                                                                                                                                                                                                                                                                                                                                                                                                                                                                   |                                                                                                                                       | <ul style="list-style-type: none"> <li>• Undergoing dialysis, defined as regular long-term hemodialysis with the same modality of dialysis for <math>\geq 3</math> months preceding randomization</li> </ul> |
| <ul style="list-style-type: none"> <li>• Not treated with ESA in the 8 weeks before randomization (ESA-naïve)</li> </ul>                                                                                                                                                                                                                                                                                                                                                                                                                                                                                                                                                                                                                                                                                                                                     | <ul style="list-style-type: none"> <li>• Treated with darbepoetin with no dose changes in the 8 weeks before randomization</li> </ul> | <ul style="list-style-type: none"> <li>• Treated with epoetin with no dose changes in the 8 weeks before randomization</li> </ul>                                                                            |
|                                                                                                                                                                                                                                                                                                                                                                                                                                                                                                                                                                                                                                                                                                                                                                                                                                                              | <ul style="list-style-type: none"> <li>• At least one kidney</li> </ul>                                                               |                                                                                                                                                                                                              |
| <ul style="list-style-type: none"> <li>• Mean Hb level <math>\leq 10.5</math> g/dL</li> </ul>                                                                                                                                                                                                                                                                                                                                                                                                                                                                                                                                                                                                                                                                                                                                                                | <ul style="list-style-type: none"> <li>• Mean Hb level 9.0–12.0 g/dL</li> </ul>                                                       | <ul style="list-style-type: none"> <li>• Mean Hb level 9.0–11.5 g/dL</li> </ul>                                                                                                                              |
| <b>Exclusion criteria</b>                                                                                                                                                                                                                                                                                                                                                                                                                                                                                                                                                                                                                                                                                                                                                                                                                                    |                                                                                                                                       |                                                                                                                                                                                                              |
| <ul style="list-style-type: none"> <li>• Significant acute or chronic bleeding</li> <li>• Hereditary hemoglobinopathies</li> <li>• Aplastic anemia</li> <li>• Chronic inflammatory disease that could impact erythropoiesis</li> <li>• History of cardiovascular or cerebrovascular events in previous 6 months</li> <li>• Poorly controlled hypertension or hypotension</li> <li>• Severe heart rhythm or conduction disturbances</li> <li>• Congestive heart failure (New York Heart Association class III or IV)</li> <li>• Severe hepatic insufficiency</li> <li>• Treatment with immuno- or myelosuppressant therapy within the 8 weeks before randomization (DIALOGUES 1 and 4) or immunosuppressant therapy during the 7 days before randomization (DIALOGUE 2)</li> <li>• Use of UGT1A1 inhibitors during the 7 days before randomization</li> </ul> |                                                                                                                                       |                                                                                                                                                                                                              |

CKD, chronic kidney disease; DIALOGUE, Daily oral treatment increasing endogenous Erythropoietin; eGFR, estimated glomerular filtration rate; ESA, erythropoiesis-stimulating agents; Hb, hemoglobin; TSAT, total iron binding capacity; UGT1A1, UDP glucuronosyltransferase 1 family, polypeptide A1.

**Supplementary Table S2.** Change in iron parameters and Hb over the 16 weeks of treatment in DIALOGUE 1

| Parameter                  | Molidustat                                      |                                                 | Placebo                                         |                                                 |
|----------------------------|-------------------------------------------------|-------------------------------------------------|-------------------------------------------------|-------------------------------------------------|
|                            | Overall                                         | Non-iron users                                  | Overall                                         | Non-iron users                                  |
|                            | Change from baseline to week 17 (mean $\pm$ SD) | Change from baseline to week 17 (mean $\pm$ SD) | Change from baseline to week 17 (mean $\pm$ SD) | Change from baseline to week 17 (mean $\pm$ SD) |
| Hb, g/dL<br>(n)            | 1.5 $\pm$ 1.2<br>(43)                           | 1.3 $\pm$ 1.2<br>(22)                           | 0.3 $\pm$ 1.0<br>(18)                           | 0.4 $\pm$ 1.1<br>(6)                            |
| Hepcidin, ng/mL<br>(n)     | -18.8 $\pm$ 35.2<br>(40)                        | -26.8 $\pm$ 39.2<br>(22)                        | 2.9 $\pm$ 29.9<br>(18)                          | -2.6 $\pm$ 11.0<br>(6)                          |
| Ferritin, $\mu$ g/L<br>(n) | -87.0 $\pm$ 121.3<br>(40)                       | -123.7 $\pm$ 140.4<br>(22)                      | 1.7 $\pm$ 123.6<br>(18)                         | -23.7 $\pm$ 148.9<br>(6)                        |
| Iron, $\mu$ g/dL<br>(n)    | -10.1 $\pm$ 33.9<br>(40)                        | -16.7 $\pm$ 30.9<br>(22)                        | -14.0 $\pm$ 40.0<br>(18)                        | -35.9 $\pm$ 35.6<br>(6)                         |
| TSAT, %<br>(n)             | -5.0 $\pm$ 11.7<br>(40)                         | -8.0 $\pm$ 10.9<br>(22)                         | -4.7 $\pm$ 13.7<br>(18)                         | -8.2 $\pm$ 4.5<br>(5)                           |
| TIBC, $\mu$ mol/L<br>(n)   | 2.4 $\pm$ 7.4<br>(40)                           | 3.8 $\pm$ 8.0<br>(22)                           | -1.2 $\pm$ 5.1<br>(18)                          | -1.7 $\pm$ 5.6<br>(5)                           |

Note: data are mean  $\pm$  SD.

DIALOGUE, Daily oral treatment increasing endogenous Erythropoietin; Hb, hemoglobin; SD, standard deviation; TIBC, total iron binding capacity; TSAT, transferrin saturation.

**Supplementary Table S3.** Change in iron parameters and Hb over the 16 weeks of treatment in DIALOGUE 2

| Parameters                 | Molidustat                                      |                                                 | Darbepoetin                                     |                                                 |
|----------------------------|-------------------------------------------------|-------------------------------------------------|-------------------------------------------------|-------------------------------------------------|
|                            | Overall                                         | Non-iron users                                  | Overall                                         | Non-iron users                                  |
|                            | Change from baseline to week 17 (mean $\pm$ SD) | Change from baseline to week 17 (mean $\pm$ SD) | Change from baseline to week 17 (mean $\pm$ SD) | Change from baseline to week 17 (mean $\pm$ SD) |
| Hb, g/dL<br>(n)            | 0.3 $\pm$ 1.0<br>(75)                           | 0.33 $\pm$ 0.9<br>(32)                          | 0.1 $\pm$ 0.9<br>(27)                           | 0.1 $\pm$ 1.2<br>(12)                           |
| Hepcidin, ng/mL<br>(n)     | -10.4 $\pm$ 28.0<br>(72)                        | -15.3 $\pm$ 29.1<br>(29)                        | 13.6 $\pm$ 28.2<br>(27)                         | 13.0 $\pm$ 29.2<br>(12)                         |
| Ferritin, $\mu$ g/L<br>(n) | -21.8 $\pm$ 122.2<br>(70)                       | -70.8 $\pm$ 88.0<br>(30)                        | -15.4 $\pm$ 105.5<br>(27)                       | -25.0 $\pm$ 128.6<br>(12)                       |
| Iron, $\mu$ g/dL<br>(n)    | -9.7 $\pm$ 53.7<br>(70)                         | -16.3 $\pm$ 71.6<br>(30)                        | 5.2 $\pm$ 28.9<br>(27)                          | 6.6 $\pm$ 38.5<br>(12)                          |
| TSAT, %<br>(n)             | -1.6 $\pm$ 13.8<br>(70)                         | -2.6 $\pm$ 16.4<br>(29)                         | 1.9 $\pm$ 10.6<br>(27)                          | 2.1 $\pm$ 12.3<br>(11)                          |
| TIBC, $\mu$ mol/L<br>(n)   | 0.0 $\pm$ 7.1<br>(70)                           | 1.3 $\pm$ 7.2<br>(30)                           | -0.4 $\pm$ 5.6<br>(27)                          | -1.0 $\pm$ 7.7<br>(11)                          |

Note: data are mean  $\pm$  SD.

DIALOGUE, Dally orAL treatment increasing endOGenoUs Erythropoietin; Hb, hemoglobin; SD, standard deviation; TIBC, total iron binding capacity; TSAT, transferrin saturation.

**Supplementary Table S4.** Change in iron parameters and Hb over the 16 weeks of treatment in DIALOGUE 4

| Parameter                  | Molidustat                                      |                                                 | Epoetin                                         |                                                 |
|----------------------------|-------------------------------------------------|-------------------------------------------------|-------------------------------------------------|-------------------------------------------------|
|                            | Overall                                         | Non-iron users                                  | Overall                                         | Non-iron users                                  |
|                            | Change from baseline to week 17 (mean $\pm$ SD) | Change from baseline to week 17 (mean $\pm$ SD) | Change from baseline to week 17 (mean $\pm$ SD) | Change from baseline to week 17 (mean $\pm$ SD) |
| Hb, g/dL<br>(n)            | -0.6 $\pm$ 1.5<br>(105)                         | -0.1 $\pm$ 1.3<br>(39)                          | -0.3 $\pm$ 1.0<br>(39)                          | -0.3 $\pm$ 0.9<br>(13)                          |
| Hepcidin, ng/mL<br>(n)     | -0.2 $\pm$ 40.7<br>(156)                        | -14.3 $\pm$ 34.7<br>(39)                        | 6.4 $\pm$ 38.6<br>(38)                          | 7.0 $\pm$ 34.4<br>(13)                          |
| Ferritin, $\mu$ g/L<br>(n) | 28.7 $\pm$ 227.8<br>(157)                       | -63.9 $\pm$ 181.3<br>(38)                       | 57.5 $\pm$ 253.8<br>(39)                        | -17.7 $\pm$ 167.7<br>(13)                       |
| Iron, $\mu$ g/dL<br>(n)    | 2.7 $\pm$ 24.2<br>(157)                         | 1.2 $\pm$ 24.8<br>(38)                          | 6.7 $\pm$ 26.2<br>(39)                          | 14.2 $\pm$ 20.4<br>(13)                         |
| TSAT, %<br>(n)             | -0.1 $\pm$ 13.3<br>(157)                        | -2.5 $\pm$ 13.7<br>(38)                         | 0.5 $\pm$ 12.9<br>(38)                          | 2.9 $\pm$ 11.8<br>(13)                          |
| TIBC, $\mu$ mol/L<br>(n)   | 3.9 $\pm$ 16.4<br>(157)                         | 7.7 $\pm$ 25.7<br>(38)                          | 1.8 $\pm$ 10.1<br>(39)                          | 2.8 $\pm$ 6.5<br>(13)                           |

Note: data are mean  $\pm$  SD.

DIALOGUE, Dally orAL treatment increasing endOGenoUs Erythropoietin; Hb, hemoglobin; SD, standard deviation; TIBC, total iron binding capacity; TSAT, transferrin saturation.
